# Supplementary material for: Fungi characteristics of biofilms from sewage and greywater in small diameter gravity sewers
Source: Royal Society of Chemistry journal article supplement (doi:10.1039/c9ew00840c), 2019-11-12
Supplement: c9ew00840c1.pdf [file c9ew00840c1.pdf]

1 **Fungi characteristics of biofilms from sewage and greywater in small diameter gravity sewers**

2 Wenkai Li<sup>a, b</sup>, Tianlong Zheng<sup>a, b, \*</sup>, Yingqun Ma<sup>c</sup>, Junxin Liu<sup>a, b, \*</sup>

3 a. State Key Joint Laboratory of Environment Simulation and Pollution Control, Research Center for  
4 Eco-Environmental Sciences, Chinese Academy of Sciences, 18 Shuangqing Road, Haidian  
5 District, Beijing 100085, China;

6 b. University of Chinese Academy of Sciences, 19 (A) Yuquan Road, Shijingshan District, Beijing  
7 100049, China;

8 c. Advanced Environmental Biotechnology Centre, Nanyang Environment & Water Research Institute,  
9 Nanyang Technological University, 1 Cleantech Loop, Singapore 637141, Singapore;

10

11

12

13 The number of pages, tables, and figures in this supplementary data are 11, 3, 7, respectively.

14

15  
16

Table S1 Composition of synthetic greywater.

| Substance                                           | Concentration (mg/L) | Substance                                               | Concentration ( $\mu\text{g/L}$ ) |
|-----------------------------------------------------|----------------------|---------------------------------------------------------|-----------------------------------|
| Glucose                                             | 80                   | $\text{CaCl}_2 \cdot 2\text{H}_2\text{O}$               | 73.5                              |
| Peptone                                             | 80                   | $\text{Na}_2\text{SiO}_3 \cdot 9\text{H}_2\text{O}$     | 30.43                             |
| $\text{CH}_3\text{COONa}$                           | 54.1                 | $\text{Al}_2(\text{SO}_4)_3 \cdot 16\text{H}_2\text{O}$ | 11.78                             |
| $\text{NaHCO}_3$                                    | 91.3                 | $\text{FeCl}_3 \cdot 6\text{H}_2\text{O}$               | 4.83                              |
| KCl                                                 | 57.4                 | $\text{MgSO}_4 \cdot 7\text{H}_2\text{O}$               | 51.25                             |
| $\text{KNO}_3$                                      | 7.2                  | $\text{H}_3\text{BO}_3$                                 | 0.58                              |
| $\text{NH}_4\text{Cl}$                              | 19                   | $\text{MnCl}_2 \cdot 4\text{H}_2\text{O}$               | 0.27                              |
| $\text{NaH}_2\text{PO}_4 \cdot 2\text{H}_2\text{O}$ | 15.12                | $\text{ZnSO}_4 \cdot 7\text{H}_2\text{O}$               | 0.88                              |
| Edible oil                                          | 30                   | $\text{CuSO}_4 \cdot 5\text{H}_2\text{O}$               | 0.39                              |
| Sodium dodecyl<br>benzene sulfonate                 | 5                    | KI                                                      | 0.03                              |
| pH                                                  | $\sim 7$             | EDTA                                                    | 20                                |

17

Table S2 Network OTU taxonomy of sewage SDGS biofilms (Fig. 6a).

| Label  | Kingdom | Genus               | Species                          | Abundance (%) |
|--------|---------|---------------------|----------------------------------|---------------|
| OTU1   | Fungi   | Unclassified        | Unclassified                     | 6.09          |
| OTU115 | Fungi   | Unclassified        | Unclassified                     | 0.00          |
| OTU12  | Fungi   | <i>Fusicolla</i>    | Unclassified                     | 0.54          |
| OTU132 | Fungi   | Unclassified        | Unclassified                     | 0.00          |
| OTU14  | Fungi   | Unclassified        | Unclassified                     | 0.39          |
| OTU15  | Fungi   | Unclassified        | Unclassified                     | 0.41          |
| OTU150 | Fungi   | Unclassified        | Unclassified                     | 0.00          |
| OTU16  | Fungi   | <i>Mucor</i>        | <i>Mucor irregularis</i>         | 0.43          |
| OTU17  | Fungi   | Unclassified        | Unclassified                     | 0.24          |
| OTU18  | Fungi   | <i>Cladosporium</i> | <i>Cladosporium halotolerans</i> | 0.11          |
| OTU19  | Fungi   | Unclassified        | Unclassified                     | 0.21          |
| OTU20  | Fungi   | Unclassified        | Unclassified                     | 0.29          |
| OTU22  | Fungi   | <i>Debaryomyces</i> | Unclassified                     | 0.25          |
| OTU23  | Fungi   | <i>Mucor</i>        | <i>Mucor circinelloides</i>      | 0.49          |
| OTU24  | Fungi   | Unclassified        | Unclassified                     | 0.18          |
| OTU25  | Fungi   | <i>Rhodotorula</i>  | <i>Rhodotorula diobovata</i>     | 0.13          |
| OTU27  | Fungi   | <i>Candida</i>      | <i>Candida tropicalis</i>        | 0.12          |
| OTU29  | Fungi   | <i>Cladosporium</i> | <i>Cladosporium delicatulum</i>  | 0.03          |
| OTU3   | Fungi   | <i>Rhodotorula</i>  | <i>Rhodotorula mucilaginosa</i>  | 2.04          |

---

|        |         |                       |                               |      |
|--------|---------|-----------------------|-------------------------------|------|
| OTU30  | Fungi   | Unclassified          | Unclassified                  | 0.13 |
| OTU31  | Fungi   | <i>Exophiala</i>      | <i>Exophiala oligosperma</i>  | 0.08 |
| OTU34  | Fungi   | Unclassified          | Unclassified                  | 0.03 |
| OTU37  | Fungi   | Unclassified          | Unclassified                  | 0.09 |
| OTU38  | Fungi   | Unclassified          | Unclassified                  | 0.11 |
| OTU42  | Fungi   | <i>Rhinocladiella</i> | <i>Rhinocladiella similis</i> | 0.02 |
| OTU47  | Fungi   | Unclassified          | Unclassified                  | 0.02 |
| OTU48  | Metazoa | Unclassified          | Unclassified                  | 0.05 |
| OTU49  | Fungi   | Unclassified          | Unclassified                  | 0.01 |
| OTU5   | Fungi   | <i>Fusarium</i>       | Unclassified                  | 0.03 |
| OTU53  | Fungi   | Unclassified          | Unclassified                  | 0.04 |
| OTU54  | Fungi   | Unclassified          | Unclassified                  | 0.01 |
| OTU56  | Metazoa | Unclassified          | Unclassified                  | 0.03 |
| OTU57  | Fungi   | Unclassified          | Unclassified                  | 0.01 |
| OTU6   | Fungi   | <i>Trichoderma</i>    | Unclassified                  | 0.35 |
| OTU60  | Fungi   | <i>Arthrotrrys</i>    | <i>Arthrotrrys oligospora</i> | 0.01 |
| OTU620 | Fungi   | Unclassified          | Unclassified                  | 0.01 |
| OTU7   | Metazoa | Unclassified          | Unclassified                  | 1.42 |
| OTU72  | Fungi   | Unclassified          | Unclassified                  | 0.02 |
| OTU73  | Fungi   | Unclassified          | Unclassified                  | 0.00 |
| OTU752 | Fungi   | <i>Rhodotorula</i>    | Unclassified                  | 0.05 |
| OTU77  | Fungi   | <i>Penicillium</i>    | Unclassified                  | 0.01 |

---

|        |       |                  |                          |      |
|--------|-------|------------------|--------------------------|------|
| OTU8   | Fungi | <i>Fusicolla</i> | Unclassified             | 1.09 |
| OTU82  | Fungi | Unclassified     | Unclassified             | 0.01 |
| OTU84  | Fungi | <i>Mucor</i>     | <i>Mucor irregularis</i> | 0.01 |
| OTU9   | Fungi | Unclassified     | Unclassified             | 0.00 |
| OTU91  | Fungi | Unclassified     | Unclassified             | 0.01 |
| OTU938 | Fungi | Unclassified     | Unclassified             | 0.01 |
| OTU95  | Fungi | Unclassified     | Unclassified             | 0.01 |
| OTU98  | Fungi | Unclassified     | Unclassified             | 0.01 |

---

19

20

21

22

Table S3 Network OTU taxonomy of greywater SDGS biofilms (Fig. 6b).

| Label  | Kingdom    | Genus               | Species                          | Abundance (%) |
|--------|------------|---------------------|----------------------------------|---------------|
| OTU1   | Fungi      | Unclassified        | Unclassified                     | 1.08          |
| OTU10  | Fungi      | <i>Exophiala</i>    | <i>Exophiala equina</i>          | 0.94          |
| OTU105 | Fungi      | Unclassified        | Unclassified                     | 0.00          |
| OTU11  | Unassigned | Unassigned          | Unassigned                       | 0.82          |
| OTU115 | Fungi      | Unclassified        | Unclassified                     | 0.00          |
| OTU122 | Fungi      | Unclassified        | Unclassified                     | 0.01          |
| OTU13  | Fungi      | Unclassified        | Unclassified                     | 0.32          |
| OTU14  | Fungi      | Unclassified        | Unclassified                     | 0.15          |
| OTU142 | Fungi      | Unclassified        | Unclassified                     | 0.00          |
| OTU16  | Fungi      | <i>Mucor</i>        | <i>Mucor irregularis</i>         | 0.04          |
| OTU18  | Fungi      | <i>Cladosporium</i> | <i>Cladosporium halotolerans</i> | 0.33          |
| OTU181 | Fungi      | Unclassified        | Unclassified                     | 0.00          |
| OTU19  | Fungi      | Unclassified        | Unclassified                     | 0.09          |
| OTU21  | Metazoa    | Unclassified        | Unclassified                     | 0.44          |
| OTU22  | Fungi      | <i>Debaryomyces</i> | Unclassified                     | 0.05          |
| OTU23  | Fungi      | <i>Mucor</i>        | <i>Mucor circinelloides</i>      | 0.07          |
| OTU25  | Fungi      | <i>Rhodotorula</i>  | <i>Rhodotorula diobovata</i>     | 0.09          |
| OTU28  | Fungi      | <i>Gibberella</i>   | <i>Gibberella intricans</i>      | 0.20          |
| OTU29  | Fungi      | <i>Cladosporium</i> | <i>Cladosporium delicatulum</i>  | 0.12          |

---

|        |       |                            |                                 |      |
|--------|-------|----------------------------|---------------------------------|------|
| OTU3   | Fungi | <i>Rhodotorula</i>         | <i>Rhodotorula mucilaginosa</i> | 0.75 |
| OTU315 | Fungi | Unclassified               | Unclassified                    | 0.00 |
| OTU32  | Fungi | <i>Cystobasidium</i>       | <i>Cystobasidium slooffiae</i>  | 0.11 |
| OTU329 | Fungi | Unclassified               | Unclassified                    | 0.01 |
| OTU33  | Fungi | <i>Fusarium</i>            | Unclassified                    | 0.12 |
| OTU34  | Fungi | Unclassified               | Unclassified                    | 0.09 |
| OTU36  | Fungi | <i>Aspergillus</i>         | <i>Aspergillus sydowii</i>      | 0.07 |
| OTU39  | Fungi | Unclassified               | Unclassified                    | 0.08 |
| OTU4   | Fungi | <i>Cutaneotrichosporon</i> | Unclassified                    | 1.83 |
| OTU40  | Fungi | Unclassified               | Unclassified                    | 0.10 |
| OTU41  | Fungi | <i>Alternaria</i>          | Unclassified                    | 0.02 |
| OTU44  | Fungi | Unclassified               | Unclassified                    | 0.04 |
| OTU448 | Fungi | Unclassified               | Unclassified                    | 0.51 |
| OTU45  | Fungi | Unclassified               | Unclassified                    | 0.07 |
| OTU47  | Fungi | Unclassified               | Unclassified                    | 0.01 |
| OTU5   | Fungi | <i>Fusarium</i>            | Unclassified                    | 1.66 |
| OTU50  | Fungi | Unclassified               | Unclassified                    | 0.05 |
| OTU52  | Fungi | Unclassified               | Unclassified                    | 0.03 |
| OTU527 | Fungi | <i>Fusarium</i>            | Unclassified                    | 0.15 |
| OTU53  | Fungi | Unclassified               | Unclassified                    | 0.02 |
| OTU54  | Fungi | Unclassified               | Unclassified                    | 0.01 |
| OTU55  | Fungi | <i>Chaetomium</i>          | <i>Chaetomium homopilatum</i>   | 0.02 |

---

---

|        |         |                    |                                |      |
|--------|---------|--------------------|--------------------------------|------|
| OTU6   | Fungi   | <i>Trichoderma</i> | Unclassified                   | 1.20 |
| OTU63  | Fungi   | Unclassified       | Unclassified                   | 0.01 |
| OTU66  | Fungi   | Unclassified       | Unclassified                   | 0.01 |
| OTU67  | Fungi   | Unclassified       | Unclassified                   | 0.08 |
| OTU7   | Metazoa | Unclassified       | Unclassified                   | 0.37 |
| OTU71  | Fungi   | <i>Aspergillus</i> | <i>Aspergillus intermedius</i> | 0.02 |
| OTU72  | Fungi   | Unclassified       | Unclassified                   | 0.01 |
| OTU73  | Fungi   | Unclassified       | Unclassified                   | 0.00 |
| OTU74  | Fungi   | <i>Penicillium</i> | <i>Penicillium citrinum</i>    | 0.00 |
| OTU75  | Fungi   | <i>Meira</i>       | <i>Meira nashicola</i>         | 0.01 |
| OTU752 | Fungi   | <i>Rhodotorula</i> | Unclassified                   | 0.04 |
| OTU79  | Fungi   | <i>Aspergillus</i> | Unclassified                   | 0.01 |
| OTU80  | Fungi   | Unclassified       | Unclassified                   | 0.01 |
| OTU86  | Fungi   | Unclassified       | Unclassified                   | 0.01 |
| OTU9   | Fungi   | Unclassified       | Unclassified                   | 1.03 |
| OTU938 | Fungi   | Unclassified       | Unclassified                   | 0.00 |
| OTU95  | Fungi   | Unclassified       | Unclassified                   | 0.00 |
| OTU97  | Fungi   | Unclassified       | Unclassified                   | 0.00 |

---

23

24

25

26



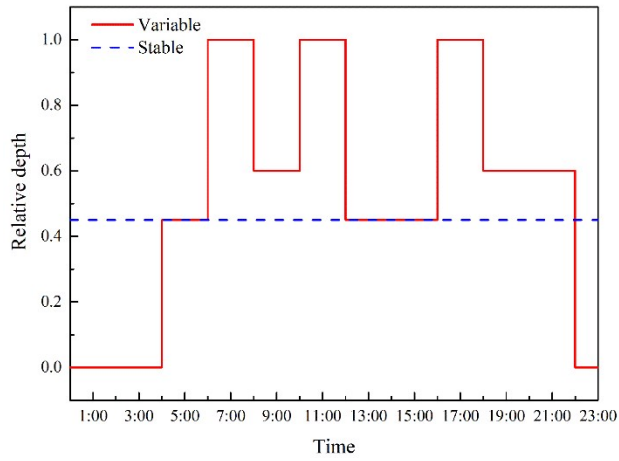

27

28

Fig. S1 Relative depth of flow conditions in sewers.

29

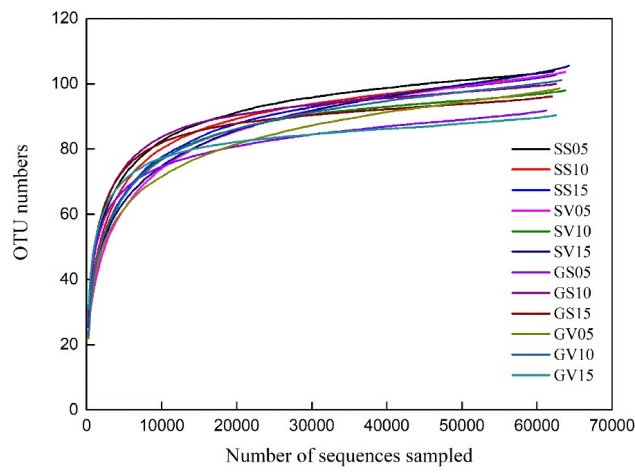

30

31

Fig. S2 Average rarefaction curves in this experiment.

32

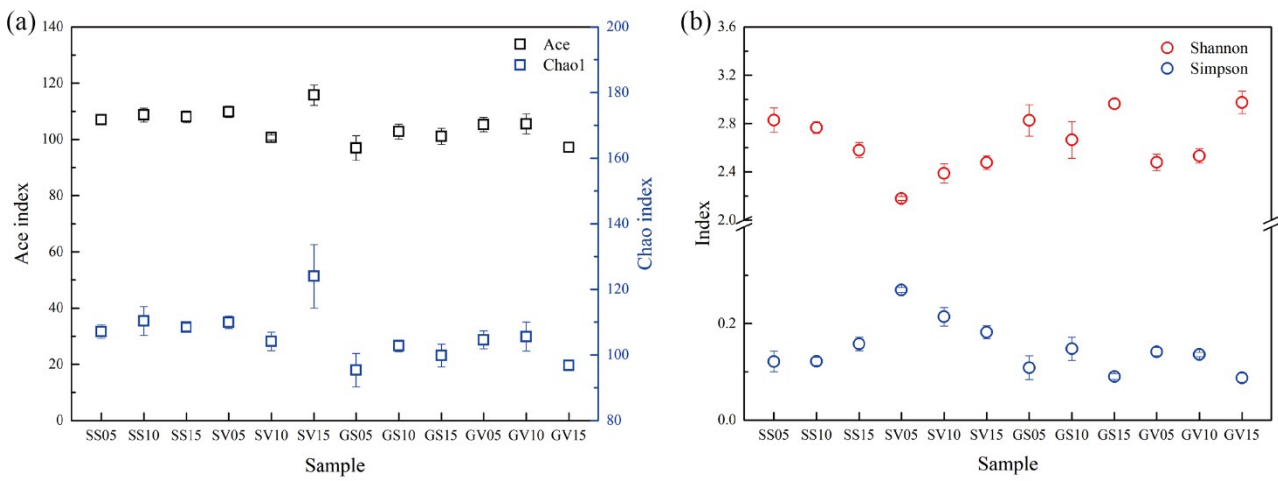

33

34

Fig. S3 Alpha-diversity index of fungi samples.

35

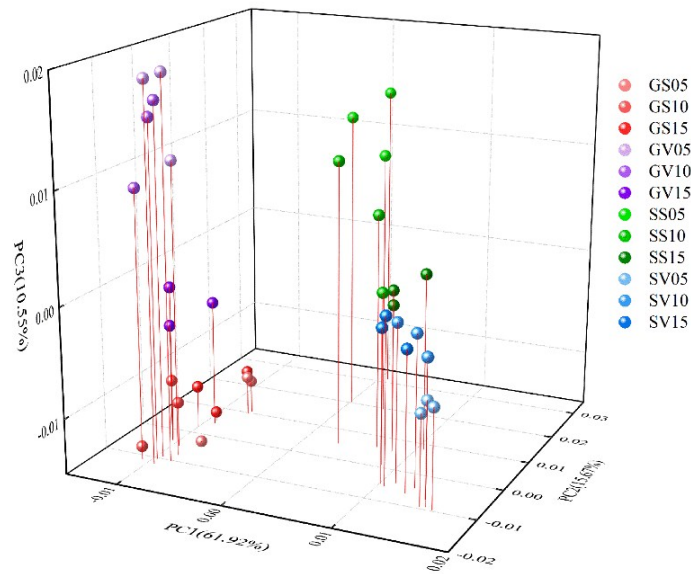

36

37

Fig. S4 PCA diagram of fungi in SDGS biofilms.

38

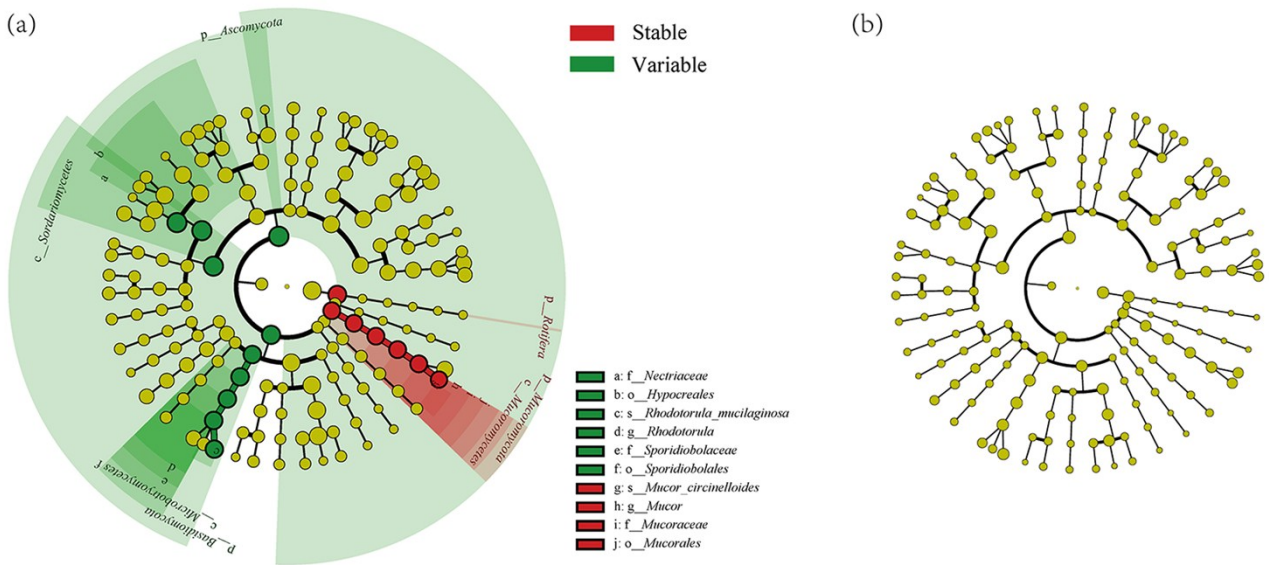

39

Fig. S5 Linear discriminant analysis effect size (LEfSe) of fungi in different flow conditions (a) and

41

different slopes (b) (linear discriminant analysis (LDA) score > 4).

42

43

44

45

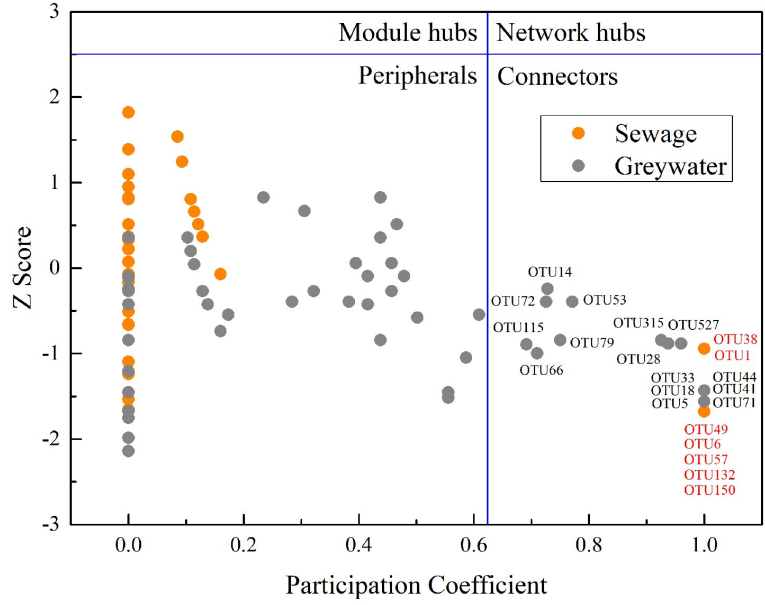

46  
47 Fig. S6 Z-P figure of fungi network in biofilms of small diameter gravity sewers.

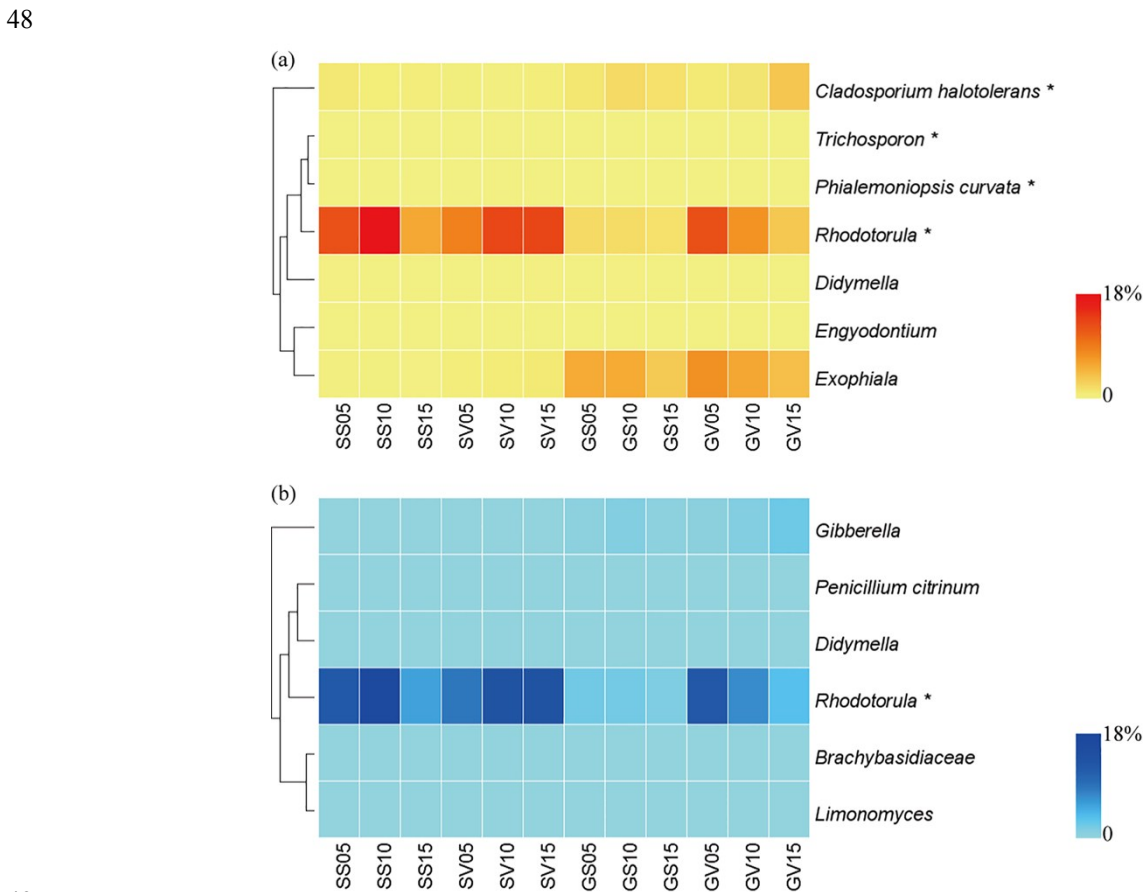

49  
50 Fig. S7 The abundance heatmap of animal pathogen (a) and plant pathogen (b). \* means  
51 opportunistic human pathogen.
